# Supplementary material for: Study of the Molecular Architectures of 2-(4-Chlorophenyl)-5-(pyrrolidin-1-yl)-2H-1,2,3-triazole-4-carboxylic Acid Using Their Vibrational Spectra, Quantum Chemical Calculations and Molecular Docking with MMP-2 Receptor
Source: MDPI journal article supplement (doi:10.3390/pharmaceutics15122686), 2023-11-27
Supplement: s1 [file s1]

## SUPPLEMENTARY MATERIAL

# Study of the Molecular Architectures of 2-(4-Chlorophenyl)-5-(pyrrolidin-1-yl)-2*H*-1,2,3-triazole-4-carboxylic Acid Using Their Vibrational Spectra, Quantum Chemical Calculations and Molecular Docking with MMP-2 Receptor

Mauricio Alcolea Palafox <sup>1,\*</sup>, Nataliya P. Belskaya <sup>2</sup> and Irena P. Kostova <sup>3,\*</sup>

<sup>1</sup> Departamento de Química Física, Facultad de Ciencias Químicas, Universidad Complutense, 28040 Madrid, Spain

<sup>2</sup> Department of Technology for Organic Synthesis, Ural Federal University, 19 Mira Str., 620012 Yekaterinburg, Russia

<sup>3</sup> Department of Chemistry, Faculty of Pharmacy, Medical University of Sofia, 2 Dunav Str., 1000 Sofia, Bulgaria

\* Correspondence: alcolea@ucm.es (M.A.P.); irenakostova@yahoo.com (I.P.K.)

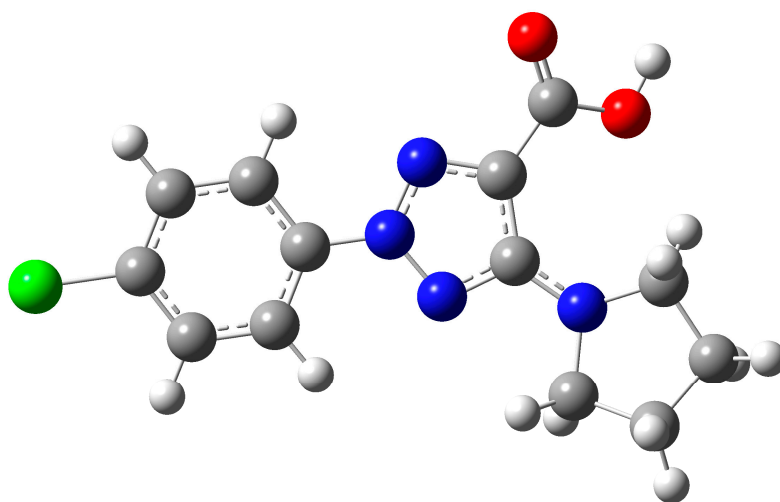

$$E(\text{B3LYP}) = -1332.610258 \text{ A.U. } (G = -1332.658313 \text{ AU})$$

**Figure S1.** Optimized structure of **1b** at the B3LYP/6-31G(d,p) level in another conformation.

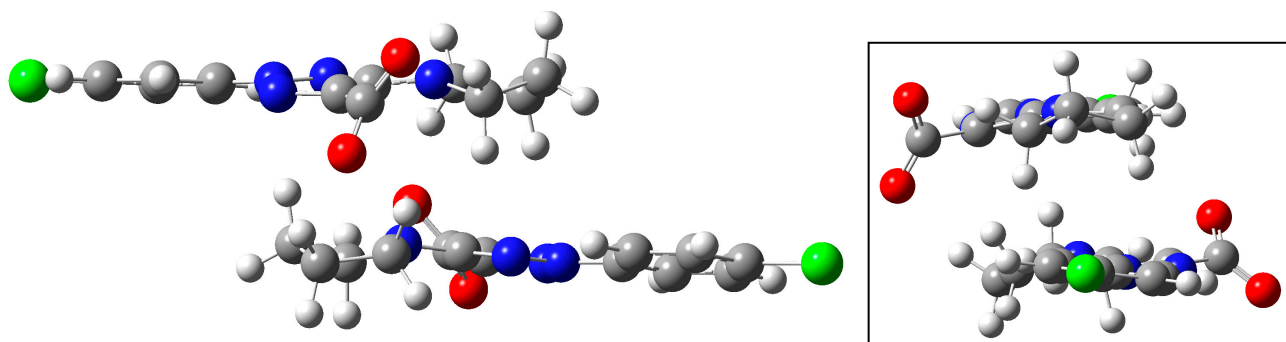

**Figure S2.** Two views of the optimized dimer *form I* of **2b** at the MP2/6-31G(d,p) level.

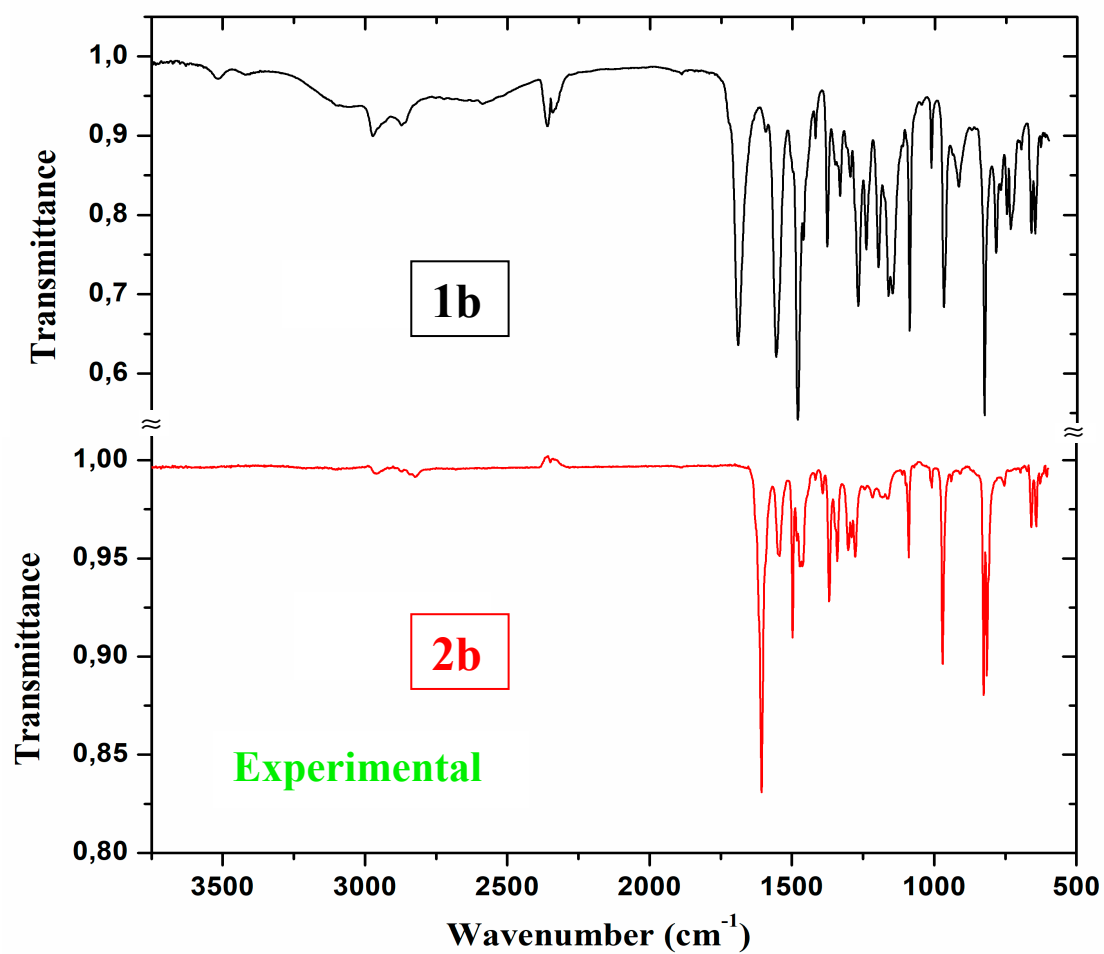

**Figure S3.** Comparison of the theoretical scaled IR spectra at the B3LYP/6-31G(d,p) level with the experimental ones of **1b** and **2b** molecules in the 3750-500  $\text{cm}^{-1}$  range.

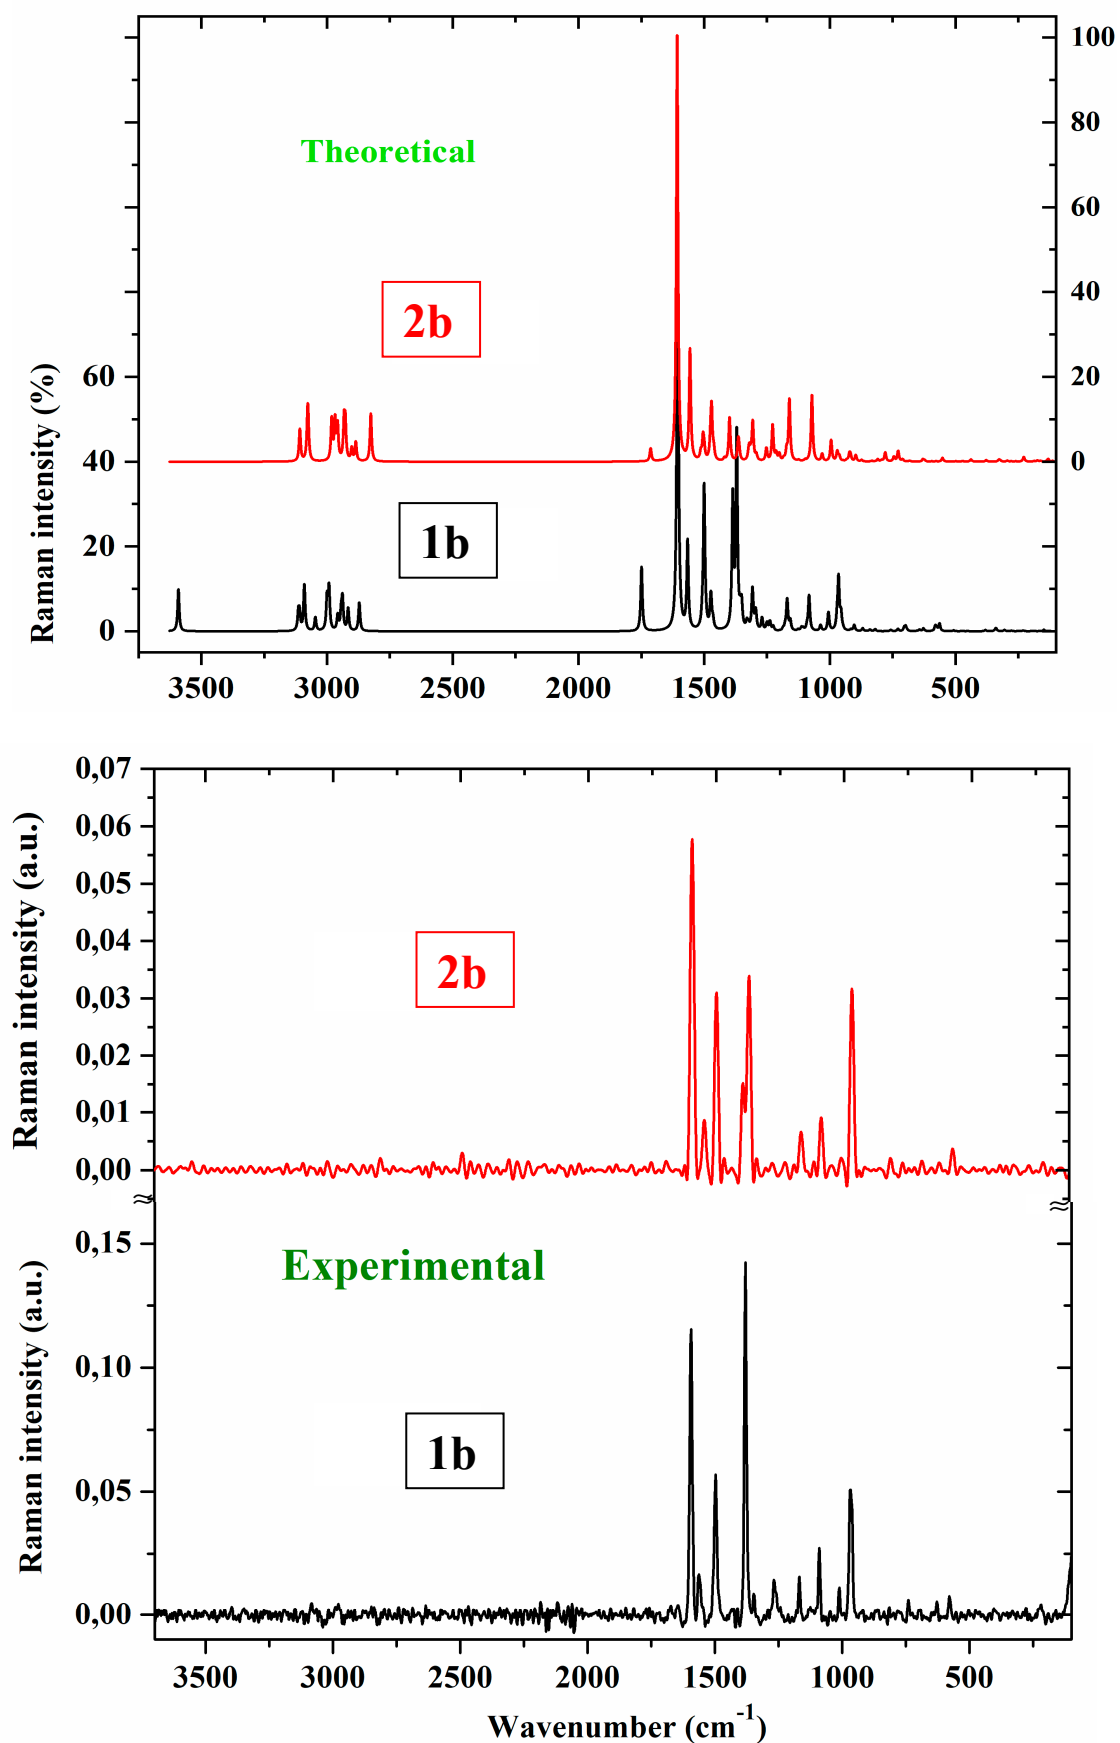

**Figure S4.** Comparison of the theoretical scaled Raman spectra at the B3LYP/6-31G(d,p) level with the experimental ones in the 3750-100  $\text{cm}^{-1}$  range of **1b** and **2b** molecules.

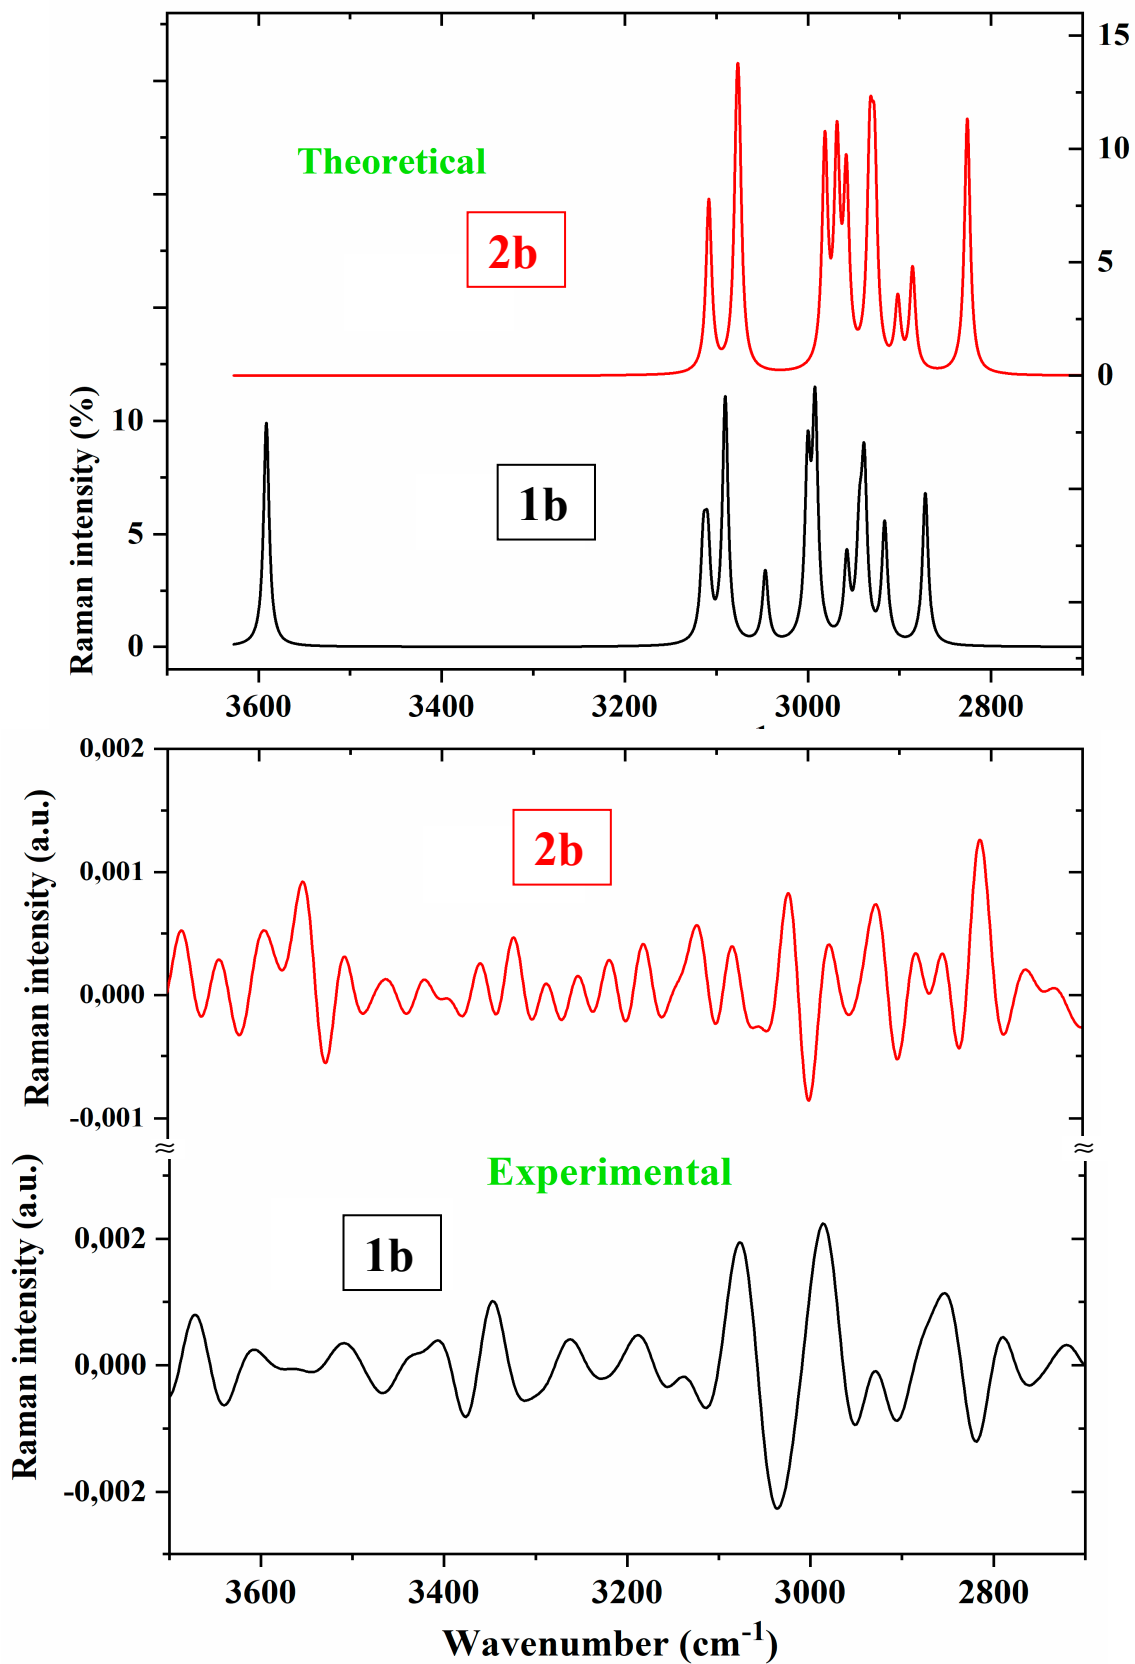

**Figure S5.** Comparison of the theoretical scaled Raman spectra at the B3LYP/6-31G(d,p) level with the experimental ones of **1b** and **2b** molecules in the 3700-2700  $\text{cm}^{-1}$  range.

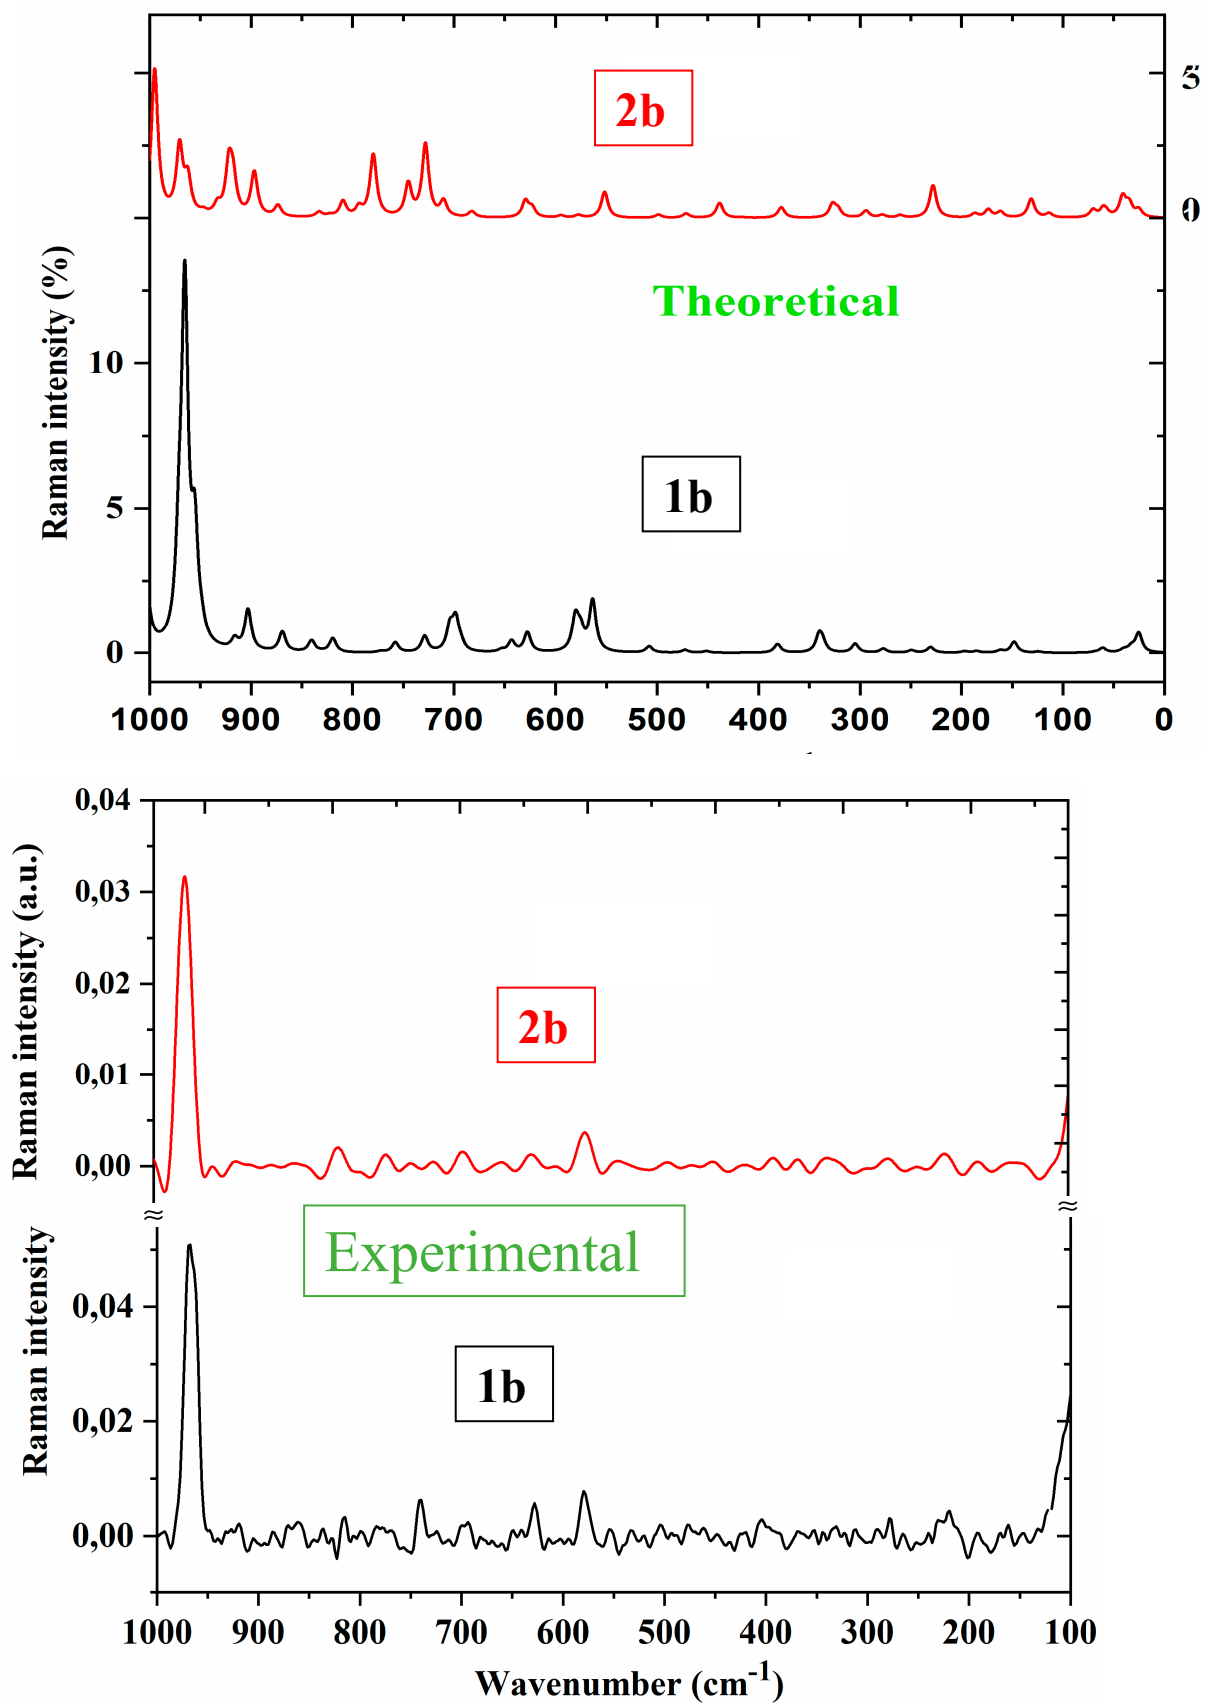

**Figure S6.** Comparison of the theoretical scaled Raman spectra at the B3LYP/6-31G(d,p) level with the experimental ones of **1b** and **2b** molecules in the 1000 - 0 and 1000 -100  $\text{cm}^{-1}$  ranges, respectively.

**Table S1.** Calculated harmonic wavenumbers ( $\nu$ ,  $\text{cm}^{-1}$ ), scaled ( $\nu$ ,  $\text{cm}^{-1}$ ) wavenumbers obtained and the linear scaling equation procedure (LSE) and the polynomial scaling equation procedure (PSE), experimental (Exp) wavenumbers, relative infrared intensity (A) in % and relative Raman intensity (S) in % obtained at the B3LYP/6-31G(d,p) level in 1b and 2b molecules. In the main characterization of the different bands, the number of the ring mode corresponds to Wilson's notation [59].

| No. | 1b                 |                     |                     |     |     |           |           |                                                                               | 2b                 |                     |                     |     |     |           |           |                                                                                            |
|-----|--------------------|---------------------|---------------------|-----|-----|-----------|-----------|-------------------------------------------------------------------------------|--------------------|---------------------|---------------------|-----|-----|-----------|-----------|--------------------------------------------------------------------------------------------|
|     | $\nu_{\text{cal}}$ | TLSE                | PSE                 | A   | S   | Exp       |           | Characterization                                                              | $\nu_{\text{cal}}$ | TLSE                | PSE                 | A   | S   | Exp       |           | Characterization                                                                           |
|     |                    | $\nu_{\text{scal}}$ | $\nu_{\text{scal}}$ |     |     | IR        | Raman     |                                                                               |                    | $\nu_{\text{scal}}$ | $\nu_{\text{scal}}$ |     |     | IR        | Raman     |                                                                                            |
| 1   | 3761               | 3606                | 3591                | 15  | 17  | 3516.0 w  | 3599.7vw  | v(O-H) free (100)                                                             | -                  | --                  | --                  | --  | --  | --        | --        | -                                                                                          |
|     | --                 | --                  | --                  | --  | --  | 3420.6vw  |           | v(O-H) H-bonded                                                               | -                  | --                  | --                  | --  | --  | --        | --        | -                                                                                          |
| 2   | 3246               | 3116                | 3114                | 0   | 6   |           | 3146.5 vw | 2, v(C3-H) in phenyl (100)                                                    | 3240               | 3111                | 3109                | 0   | 7   | 3111.0 vw | 3120.4 vw | 2, v(C3-H) in phenyl (100)                                                                 |
| 3   | 3241               | 3112                | 3110                | 0   | 6   |           | 3107.9 vw | 20b, v(C5-H) in phenyl (100)                                                  | 3239               | 3110                | 3108                | 0   | 4   | 3103.3 vw | 3111.8 vw | 20b, v(C5-H) in phenyl (100)                                                               |
| 4   | 3220               | 3092                | 3090                | 0   | 8   |           |           | 7b, v(C-H) in phenyl (100)                                                    | 3207               | 3076                | 3075                | 2   | 11  | 3097.5 vw | 3091.5 vw | 7b, v(C6-H) in phenyl (100)                                                                |
| 5   | 3220               | 3092                | 3090                | 0   | 7   |           | 3084.8 vw | 20a, v(C-H) in phenyl (100)                                                   | 3204               | 3073                | 3072                | 2   | 11  |           |           | 20a, v(C2-H) in phenyl (100)                                                               |
| 6   | 3173               | 3047                | 3046                | 2   | 5   | 3054.1w-m | 3065.5 vw | $\nu_{\text{as}}(\text{C-H})$ in C18H <sub>2</sub> pyrrol (100)               | 3103               | 2980                | 2981                | 12  | 14  |           | 2986.4 vw | $\nu_{\text{as}}(\text{C-H})$ in C16H <sub>2</sub> , C17H <sub>2</sub> (100)               |
| 7   | 3123               | 2999                | 3000                | 7   | 11  | 2973.1 m  | 2990.3 vw | $\nu_{\text{as}}(\text{C-H})$ in C16H <sub>2</sub> , C17H <sub>2</sub> pyrrol | 3089               | 2967                | 2968                | 8   | 13  | 2965.4 w  | 2965.2 vw | $\nu_{\text{as}}(\text{C-H})$ in C16H <sub>2</sub> , C17H <sub>2</sub> (100)               |
| 8   | 3115               | 2992                | 2992                | 5   | 14  |           | 2978.7 w  | $\nu_{\text{as}}(\text{C-H})$ in C16H <sub>2</sub> , C17H <sub>2</sub> pyrrol | 3078               | 2957                | 2958                | 19  | 11  | 2959.6 w  | 2953.6 vw | $\nu_{\text{as}}(\text{C-H})$ in C18H <sub>2</sub> pyrrol (100)                            |
| 9   | 3078               | 2957                | 2958                | 5   | 5   |           | 2959.4 vw | v(C-H) in C15H <sub>2</sub> , C16H <sub>2</sub> pyrrol                        | 3051               | 2931                | 2933                | 7   | 12  | 2941.3 vw | 2935.3 vw | $\nu_{\text{s}}(\text{C-H})$ in C17H <sub>2</sub> pyrrol (100)                             |
| 10  | 3063               | 2942                | 2944                | 4   | 6   |           | 2940.1 vw | $\nu_{\text{as}}(\text{C-H})$ in C16H <sub>2</sub> , C17H <sub>2</sub> pyrrol | 3045               | 2925                | 2927                | 11  | 11  | 2926.8 vw | 2918.9 vw | $\nu_{\text{s}}(\text{C-H})$ in C16H <sub>2</sub> pyrrol (100)                             |
| 11  | 3057               | 2937                | 2938                | 3   | 10  |           | 2938.2 vw | $\nu_{\text{s}}(\text{C-H})$ in pyrrol (100)                                  | 3018               | 2900                | 2902                | 5   | 4   | 2915.2 vw | 2906.4 vw | $\nu_{\text{as}}(\text{C-H})$ in C15H <sub>2</sub> pyrrol (100)                            |
| 12  | 3033               | 2914                | 2916                | 5   | 7   |           | 2911.2 vw | $\nu_{\text{s}}(\text{C-H})$ in C15H <sub>2</sub> pyrrol (100)                | 3001               | 2883                | 2886                | 6   | 6   | 2843.9 w  | 2880.3 vw | $\nu_{\text{s}}(\text{C-H})$ in C15H <sub>2</sub> pyrrol (100)                             |
| 13  | 2986               | 2869                | 2872                | 11  | 9   | 2871.8 m  | 2866.8 vw | $\nu_{\text{s}}(\text{C-H})$ in C18H <sub>2</sub> pyrrol (100)                | 2937               | 2822                | 2826                | 22  | 15  | 2824.6 m  | 2810.9 vw | $\nu_{\text{s}}(\text{C-H})$ in C18H <sub>2</sub> pyrrol (100)                             |
|     | --                 | --                  | --                  | --  | --  | 2359.8 w  | 2847.6 vw | v(O-H) <sub>H</sub> -bonded, Combination band                                 | --                 | --                  | --                  | --  | --  | 2357.8 w  | 2362.5 vw | Combination band                                                                           |
|     |                    |                     |                     |     |     | 2342.4 w  |           | v(O-H) <sub>H</sub> -bonded, Combination band                                 |                    |                     |                     |     |     | 2339.8 w  |           | Combination band                                                                           |
| 14  | 1800               | 1741                | 1749                | 85  | 16  | 1690.5vs  | 1644.2 w  | v(C=O) (91)                                                                   | 1762               | 1705                | 1713                | 75  | 3   | 1606.6 vs | 1613.3 vw | $\nu_{\text{as}}(\text{COO})$ (99)                                                         |
| 15  | 1650               | 1599                | 1605                | 0   | 100 |           | 1594.0 vs | 8a, v(C=C) (100)                                                              | 1652               | 1601                | 1607                | 24  | 100 |           | 1594.9 vs | 8a, v(C=C) (89)                                                                            |
| 16  | 1639               | 1588                | 1595                | 0   | 1   |           |           | 8b, v(C=C) (98)                                                               | 1624               | 1574                | 1581                | 4   | 0   |           | 1573.8 w  | 8b, v(C=C) (82)                                                                            |
| 17  | 1609               | 1560                | 1566                | 100 | 20  | 1557.4 vs | 1563.2 m  | v(C8-N14) (70) + $\nu_{\text{s}}(\text{N7CC})$ (18)                           | 1599               | 1550                | 1556                | 100 | 26  | 1543.9 m  | 1550.6 m  | v(C8-N14) (73) + $\nu_{\text{s}}(\text{N7CC})$ (15)                                        |
| 18  | 1548               | 1502                | 1507                | 4   | 2   |           | 1520.7 vw | $\delta_{\text{s}}(\text{C-H})$ in-phase in pyrrol (98)                       | 1554               | 1507                | 1513                | 1   | 2   |           | 1513.9 w  | $\delta(\text{C-H})$ in-phase in pyrrol (92)                                               |
| 19  | 1541               | 1495                | 1501                | 30  | 32  | 1500.3 sh | 1497.6 s  | 19a, v(CC, CH) in phenyl (85)                                                 | 1545               | 1499                | 1505                | 76  | 5   | 1497.6 s  | 1498.6 vs | v(CN4)(37)+19a,v(CC)(35)+ $\delta(\text{CH})$ pyrrol(15)                                   |
| 20  | 1536               | 1490                | 1496                | 3   | 2   |           |           | $\delta_{\text{s}}(\text{C-H})$ out-of-phase in pyrrol (97)                   | 1540               | 1494                | 1500                | 20  | 2   |           | 1488.9vw  | $\delta_{\text{s}}(\text{C-H})$ out-of-phase in pyrrol (88)                                |
| 21  | 1514               | 1469                | 1475                | 15  | 3   |           |           | $\delta(\text{C-H})$ out-of-phase in pyrrol (75)                              | 1514               | 1469                | 1475                | 1   | 4   | 1482.2 w  | 1485.1 w  | $\delta_{\text{s}}(\text{C-H})$ out-of-phase in pyrrol (85)                                |
| 22  | 1512               | 1467                | 1473                | 25  | 6   | 1481.2vs  |           | $\delta(\text{C-H})$ (40) + v(C-C11) (35)                                     | 1510               | 1466                | 1471                | 10  | 11  | 1471.6 m  | 1471.6 m  | $\nu_{\text{s}}(\text{CN})$ in triazol(42)+ $\delta_{\text{s}}(\text{C-H})$ in pyrrol (35) |
| 23  | 1504               | 1460                | 1465                | 2   | 2   | 1462.0 m  | 1451.3 vw | $\delta_{\text{s}}(\text{C-H})$ out-of-phase in pyrrol (98)                   | 1501               | 1457                | 1462                | 0   | 2   | 1462.9 m  | 1466.7 w  | $\delta_{\text{s}}(\text{C-H})$ out-of-phase in pyrrol (99)                                |
|     | --                 | --                  | --                  | --  | --  | --        | --        | --                                                                            | --                 | --                  | --                  | --  | --  | --        | --        | --                                                                                         |
| 24  | 1460               | 1418                | 1423                | 2   | 0   | 1419.5 w  | 1434.0 vw | 19b, v(CC, CH) in phenyl (72)                                                 | 1457               | 1415                | 1420                | 0   | 1   | 1417.6 vw | 1427.2 vw | 19b, v(CC, CH) in phenyl (97)                                                              |
| 25  | 1422               | 1382                | 1386                | 1   | 29  |           | 1412.7 vw | $\nu_{\text{as}}(\text{NNN})(45)+\nu(\text{CN})(25)+\delta(\text{CH})(20)$    | 1436               | 1395                | 1400                | 0   | 10  | 1391.6 w  | 1395.4 s  | 19a,v(CC,CH)phenyl(40)+v(C4N)(32)                                                          |
| 26  | 1406               | 1367                | 1371                | 18  | 43  | 1378.1 m  | 1379.9 vs | v(C4N)(35)+v(NNN)(30)+ $\delta(\text{CH})(25)$                                | 1400               | 1361                | 1365                | 29  | 5   | 1369.4 m  | 1373.2 vs | $\gamma_{\text{s}}(\text{C-H})$ in-phase in pyrrol (93)                                    |
| 27  | 1392               | 1353                | 1357                | 7   | 3   |           |           | $\gamma(\text{C18H})$ in pyrrol (60)+v(N10C)(25)                              | 1395               | 1356                | 1360                | 10  | 1   | 1340.5 m  | 1345.2 w  | $\nu_{\text{s}}(\text{NNN})(45)+\gamma_{\text{s}}(\text{CC,CH})$ in pyrrol (35)            |
| 28  | 1386               | 1348                | 1351                | 9   | 5   | 1349.1 w  | 1347.2 w  | $\gamma(\text{C-H})$ in pyrrol mainly in C15H <sub>2</sub> (75)               | 1358               | 1321                | 1324                | 5   | 1   |           | 1324.0 vw | 14,v(CC) in phenyl(42)+ $\gamma(\text{CH,CC})$ pyrrol(33)                                  |
| 29  | 1364               | 1327                | 1330                | 0   | 2   | 1332.7 w  |           | 14,v(CC) in phenyl (50)+ $\nu_{\text{as}}(\text{NNN})(30)$                    | 1354               | 1317                | 1320                | 3   | 2   |           | 1318.2 vw | $\nu_{\text{as}}(\text{NNN})(36)+\gamma(\text{CH})$ in pyrrol (30)                         |

|    |      |      |      |    |    |          |           |                                                                                        |      |      |      |    |    |           |           |                                                                                               |
|----|------|------|------|----|----|----------|-----------|----------------------------------------------------------------------------------------|------|------|------|----|----|-----------|-----------|-----------------------------------------------------------------------------------------------|
| 30 | 1358 | 1321 | 1324 | 0  | 1  |          |           | $\gamma(\text{C-H})$ in pyrrol (96)                                                    | 1348 | 1312 | 1315 | 9  | 1  |           | 1314.4vw  | $\gamma(\text{C-H})$ in pyrrol (73)                                                           |
| 31 | 1341 | 1305 | 1308 | 6  | 9  |          | 1306.7 vw | $\gamma(\text{CH})$ in pyrrol(40)+ $\nu(\text{CN})(30)+\delta(\text{OH})(20)$          | 1340 | 1304 | 1307 | 46 | 8  | 1301.9 m  | 1306.7 w  | $\nu_s(\text{COO})(63)+\gamma_{\text{as}}(\text{CH})\text{pyrrol}(18)+\nu(\text{N7C})(15)$    |
| 32 | 1329 | 1293 | 1296 | 2  | 3  | 1297.1 w | 1291.2 vw | $\Gamma(\text{C-H})$ in pyrrol (92)                                                    | 1326 | 1291 | 1293 | 9  | 1  | 1290.3 w  | 1292.2 w  | $\Gamma(\text{C-H})$ in pyrrol (94)                                                           |
| 33 | 1326 | 1291 | 1293 | 0  | 2  |          |           | 3, $\delta(\text{C-H})$ in phenyl (82)                                                 | 1320 | 1285 | 1288 | 1  | 0  | 1277.8 m  | 1280.6 w  | 3, $\delta(\text{C-H})$ in phenyl (97)                                                        |
| 34 | 1302 | 1268 | 1270 | 0  | 3  | 1269.1 m | 1268.1 w  | $\nu_{\text{as}}(\text{NN})(65)+3,\delta(\text{CH})$ in phenyl (25)                    | 1284 | 1251 | 1253 | 16 | 3  | 1244.0 vw | 1268.1 vw | $\gamma_{\text{as}}(\text{C-H})$ in pyrrol (98)                                               |
| 35 | 1281 | 1248 | 1250 | 3  | 2  |          |           | $\gamma_{\text{as}}(\text{C-H})$ in pyrrol (93)                                        | 1258 | 1226 | 1228 | 3  | 8  | 1217.0 w  | 1232.4 w  | $\nu(\text{NN,CN})(68)+\gamma_{\text{as}}(\text{CC,CH})$ in pyrrol (19)                       |
| 36 | 1269 | 1236 | 1238 | 10 | 2  | 1241.1 m | 1243.0 vw | $\delta(\text{OH})(40)+\nu(\text{CN})(30)+\gamma_{\text{as}}(\text{CH})$ in pyrrol(20) | 1243 | 1212 | 1213 | 0  | 2  |           | 1213.1 vw | $\gamma_{\text{as}}(\text{C-H})$ out-of-phase in pyrrol (96)                                  |
| 37 | 1256 | 1224 | 1226 | 3  | 1  |          |           | $\gamma_{\text{as}}(\text{C-H})$ out-of-phase in pyrrol (93)                           | 1230 | 1199 | 1201 | 4  | 1  |           | 1200.6 vw | $\nu_{\text{as}}(\text{NN,CN})(55)+3,\delta(\text{CH})$ in phenyl(22)                         |
| 38 | 1215 | 1185 | 1186 | 2  | 0  | 1197.7 m | 1196.7 vw | $\gamma_{\text{as}}(\text{C-H})$ out-of-phase in pyrrol (88)                           | 1212 | 1182 | 1183 | 9  | 0  | 1182.3 vw | 1192.9 vw | $\nu_{\text{as}}(\text{NN,CN})(48)+\nu(\text{CN,CC})$ in pyrrol(35)                           |
|    | --   | --   | --   | -- | -- | --       | --        | --                                                                                     | --   | --   | --   | -- | -- | --        | --        | --                                                                                            |
| 39 | 1207 | 1177 | 1178 | 5  | 1  |          |           | $\gamma(\text{C-H})$ in pyrrol (88)                                                    | 1201 | 1172 | 1172 | 4  | 2  | 1164.8 vw | 1169.7 m  | $\gamma_{\text{as}}(\text{C-H})$ out-of-phase in pyrrol (83)                                  |
| 40 | 1198 | 1169 | 1170 | 0  | 7  | 1163.0 m | 1167.8 m  | 9a, $\delta(\text{C-H})$ in phenyl (80)                                                | 1189 | 1160 | 1161 | 3  | 13 | 1161.1 vw | 1165.5 m  | 9a, $\delta(\text{C-H})$ in phenyl (93)                                                       |
| 41 | 1186 | 1157 | 1158 | 3  | 2  | 1148.5 m | 1133.1 w  | $\gamma_{\text{as}}(\text{C-H})$ in pyrrol (81)                                        | 1186 | 1157 | 1158 | 3  | 1  |           | 1158.2 vw | $\gamma_{\text{as}}(\text{C-H})$ out-of-phase in pyrrol (91)                                  |
| 42 | 1153 | 1126 | 1126 | 13 | 0  |          |           | $\delta(\text{C-H})$ in pyrrol (92)                                                    | 1151 | 1124 | 1124 | 1  | 0  | 1111.9 vw | 1119.6 w  | $\delta(\text{C-H})$ in pyrrol (93)                                                           |
| 43 | 1139 | 1113 | 1112 | 37 | 1  | 1112.9vw | 1117.7 vw | $\nu_{\text{as}}(\text{COO})(38)+\delta(\text{CH})(25)+\delta(\text{OH})(17)$          | --   | --   | --   | -- | -- | --        | --        | --                                                                                            |
| 44 | 1133 | 1107 | 1107 | 4  | 0  |          |           | 15, $\delta(\text{C-H})$ in phenyl (94)                                                | 1124 | 1099 | 1098 | 1  | 0  | 1099.4 w  | 1097.4 vw | 15, $\delta(\text{C-H})$ in phenyl (99)                                                       |
| 45 | 1117 | 1092 | 1091 | 15 | 1  |          |           | $\nu(\text{NNN})(38)+\nu_s(\text{COO})(30)+18a,\delta(\text{CH})(25)$                  | 1099 | 1075 | 1074 | 2  | 0  |           | 1079.1 vw | $\nu_s(\text{NNN})(48)+18a,\delta(\text{C-H})$ in phenyl(42)                                  |
| 46 | 1108 | 1083 | 1082 | 13 | 7  | 1088.8 s | 1090.7 m  | $\nu(\text{C-CL})$ (60) + 18a, $\delta(\text{CC})$ in phenyl (40)                      | 1097 | 1073 | 1072 | 2  | 14 | 1089.7 m  | 1089.7 s  | $\nu(\text{C-CL})(32) + 1,\delta(\text{CC})$ in phenyl(30)+ $\nu_{\text{as}}(\text{NNN})(28)$ |
|    | --   | --   | --   | -- | -- | --       | --        | --                                                                                     | --   | --   | --   | -- | -- | --        | 1051.1vw  | --                                                                                            |
| 47 | 1061 | 1039 | 1037 | 0  | 1  |          |           | $\gamma_s(\text{C-H})$ in pyrrol (80)                                                  | 1055 | 1033 | 1031 | 1  | 1  |           | 1028.0 w  | $\nu(\text{CC})$ in pyrrol (72)                                                               |
| 48 | 1029 | 1008 | 1006 | 2  | 4  | 1012.6 m | 1011.6 w  | 12, $\delta(\text{CC, CH})$ in phenyl (90)                                             | 1018 | 998  | 995  | 1  | 4  | 1008.7 w  | 1013.5 m  | 12, $\delta(\text{CC, CH})$ in phenyl (96)                                                    |
| 49 | 993  | 974  | 971  | 2  | 2  |          |           | $\gamma(\text{C-H})$ in pyrrol (83)                                                    | 993  | 978  | 971  | 1  | 2  |           | 970.1 vs  | $\delta(\text{CC,CH})$ in pyrrol (73)                                                         |
| 50 | 988  | 973  | 966  | 15 | 10 | 968.2 m  | 967.3 s   | $\nu_s(\text{NNN})(43)+12,\delta(\text{CC})(25)+\nu_s(\text{CN14C})(20)$               | 985  | 970  | 963  | 4  | 1  |           | 956.6 vw  | $\gamma_{\text{as}}(\text{C-H})$ in pyrrol (87)                                               |
| 51 | 978  | 963  | 956  | 2  | 3  |          |           | $\nu_s(\text{NNN})(50)+\gamma(\text{C-H})$ in pyrrol (35)                              | 969  | 954  | 947  | 0  | 0  | 950.2 w   | 943.1 vw  | 17a, $\gamma(\text{C-H})$ in phenyl (98)                                                      |
| 52 | 976  | 961  | 954  | 0  | 0  |          |           | 17a, $\gamma(\text{C-H})$ in phenyl (99)                                               | 954  | 939  | 933  | 0  | 0  |           | 935.4 vw  | 5, $\gamma(\text{C-H})$ in phenyl (99)                                                        |
| 53 | 970  | 955  | 948  | 0  | 0  | 937.4 vw | 938.2 vw  | 5, $\gamma(\text{C-H})$ in phenyl (100)                                                | 943  | 928  | 922  | 26 | 1  | 970.1 vs  | 923.9 vw  | $\nu_s(\text{NNN})(60)+\nu(\text{C8C})(25)+\nu(\text{CC})(15)$                                |
| 54 | 937  | 922  | 916  | 1  | 0  | 916.1 w  | 919.0 w   | $\gamma_{\text{as}}(\text{C-H})$ in pyrrol (100)                                       | 939  | 924  | 918  | 18 | 1  | 909.4 vw  | 918.1 vw  | $\gamma_{\text{as}}(\text{C-H})$ in pyrrol (86)                                               |
| 55 | 924  | 909  | 903  | 0  | 1  |          |           | $\gamma_s(\text{C-H})$ in pyrrol (100)                                                 | 917  | 902  | 897  | 1  | 1  |           | 899.8 vw  | $\gamma_s(\text{C-H})$ in pyrrol (98)                                                         |
| 56 | 889  | 874  | 869  | 0  | 1  | --       |           | $\gamma_{\text{as}}(\text{C-H})$ in pyrrol (98)                                        | 893  | 878  | 873  | 1  | 0  |           | 875.6 vw  | $\gamma_{\text{as}}(\text{C-H})$ in pyrrol (99)                                               |
| 57 | 859  | 844  | 840  | 0  | 0  |          |           | $\gamma_{\text{as}}(\text{C-H})$ in-phase in pyrrol (97)                               | 852  | 837  | 833  | 1  | 0  | 826.5 vs  | 830.3 vw  | $\gamma_{\text{as}}(\text{C-H})$ in pyrrol (97)                                               |
| 58 | 849  | 834  | 830  | 8  | 0  | 825.5 s  | 836.1 vw  | 17b, $\gamma(\text{C-H})$ in phenyl (100)                                              | 841  | 826  | 823  | 7  | 0  | 814.9 vs  | 821.7 w   | 17b, $\gamma(\text{C-H})$ in phenyl (99)                                                      |
| 59 | 838  | 823  | 820  | 0  | 0  |          |           | 10a, $\gamma(\text{C-H})$ in phenyl (100)                                              | 828  | 813  | 810  | 0  | 0  | 808.1 sh  | 813.9 w   | 10a, $\gamma(\text{C-H})$ in phenyl (100)                                                     |
|    | --   | --   | --   | -- | -- | --       | --        | --                                                                                     | 811  | 796  | 793  | 2  | 0  |           | 789.8 vw  | $\gamma_s(\text{COO})$ (54) + $\gamma_s(\text{CC9C})$ (35)                                    |
| 60 | 789  | 774  | 772  | 4  | 0  | 785.0 m  | 784.0 w   | $\gamma(\text{C8C})$ (45) + $\gamma(\text{OCO})$ (30)                                  | 797  | 782  | 780  | 17 | 2  | 782.1 vw  | 767.7 vw  | $\delta_{\text{as}}(\text{COO})$ (57) + $\gamma(\text{CC})$ (32)                              |
| 61 | 775  | 760  | 758  | 1  | 0  | 768.6 vw | 768.6 vw  | 6a, $\delta(\text{CC})$ in phenyl (42)+ $\delta(\text{CC})\text{pyrrol}(28)$           | 762  | 747  | 745  | 8  | 1  | 754.1 w   | 752.2 w   | $\delta(\text{CC})(55)+\delta_s(\text{COO})(28)+\delta(\text{triazole})(15)$                  |
| 62 | 745  | 730  | 729  | 1  | 0  | 733.9 m  | 724.3 vw  | $\delta(\text{CC})$ pyrrol (53)+6a, $\delta(\text{CC})$ in phenyl(25)                  | 744  | 729  | 728  | 0  | 2  |           | 722.3 vw  | 6a, $\delta(\text{CC})$ in phenyl(42)+ $\delta(\text{CC})$ pyrrol (28)                        |
| 63 | 720  | 705  | 704  | 6  | 1  | 704.9 vw |           | $\gamma(\text{C=O})(38)+\gamma(\text{C8CN})(30)+\gamma(\text{OH})(25)$                 | 726  | 711  | 710  | 0  | 0  |           | 710.8 vw  | $\gamma(\text{C8C})$ (45) + $\gamma_s(\text{OCO})$ (36)                                       |
| 64 | 714  | 699  | 699  | 12 | 1  | 747.4 m* | 739.7 m*  | $\delta(\text{COOH})$ (45) + $\delta(\text{NNN})$ (34)                                 | 697  | 682  | 682  | 0  | 0  | 658.7 w   | 697.3 w   | 4, $\gamma(\text{CC})$ in phenyl (98)                                                         |
| 65 | 708  | 693  | 693  | 0  | 0  | 696.3 vw | 693.4 w   | 4, $\gamma(\text{CC})$ in phenyl (100)                                                 | --   | --   | --   | -- | -- | --        | --        | --                                                                                            |
| 66 | 668  | 653  | 654  | 4  | 0  | 661.5 w  | 649.0 vw  | $\gamma_s(\text{NNN})$ (70)                                                            | 644  | 629  | 630  | 0  | 0  | 641.3 w   | 629.7 w   | 6b, $\delta(\text{CC})$ in phenyl (86)                                                        |
| 67 | 657  | 642  | 643  | 4  | 0  | 648.0 w  | 641.3 vw  | $\delta_{\text{as}}(\text{NNN})$ (35) + 6b, $\delta(\text{CC})$ (28)                   | 637  | 622  | 623  | 3  | 0  | 627.8 vw  | 612.4 vw  | $\gamma_{\text{as}}(\text{NNN})$ (58) + $\gamma_s(\text{OCO})$ (22)                           |

|    |     |     |     |    |    |          |                 |                                                                                   |     |     |     |    |    |          |           |                                                                                              |
|----|-----|-----|-----|----|----|----------|-----------------|-----------------------------------------------------------------------------------|-----|-----|-----|----|----|----------|-----------|----------------------------------------------------------------------------------------------|
| 68 | 641 | 626 | 627 | 0  | 1  | 627.8 vw | 627.8 w         | 6b, $\delta(\text{CC})$ in phenyl (73)                                            | 608 | 593 | 595 | 4  | 0  | 603.7 vw | 594.1 vvw | $\gamma_s(\text{NNN})$ (63) + $\gamma(\text{CC}\delta\text{N})$ (18)                         |
| 69 | 593 | 578 | 580 | 9  | 1  |          | 932.5vw*,579.6m | $\gamma(\text{O-H})$ (82)                                                         | --  | --  | --  | -- | -- |          | --        | --                                                                                           |
| 70 | 588 | 573 | 575 | 3  | 0  | --       |                 | $\delta_s(\text{CC})$ pyrrol (82)                                                 | 590 | 575 | 577 | 0  | 0  |          | 574.8 w   | $\delta_{as}(\text{C-H})$ in pyrrol (87)                                                     |
| 71 | 576 | 561 | 563 | 5  | 1  |          | 554.6 w         | $\delta(\text{CC})$ in pyrrol (32)+ $\delta(\text{NNN})(30)$                      | 564 | 549 | 552 | 5  | 1  |          | 555.5 w   | $\nu(\text{CCL})(38)+\delta(\text{NNN})(32)+6b,\delta(\text{CC})(15)$                        |
| 72 | 519 | 503 | 508 | 2  | 0  |          | 504.4 vw        | 16b, $\gamma(\text{CC})$ in phenyl (91)                                           | 510 | 494 | 499 | 1  | 0  |          | 491.9 vw  | 16b, $\gamma(\text{CC})$ in phenyl (91)                                                      |
| 73 | 483 | 467 | 472 | 0  | 0  |          | 477.4 vw        | $\delta(\text{CC})$ in phenyl(34)+ $\delta(\text{NNN})(30)+\delta(\text{CO})(28)$ | 482 | 466 | 471 | 1  | 0  |          | 472.6 vw  | $\delta(\text{CC})\text{phenyl}(35)+\delta(\text{NNN})(28)+\delta(\text{COO})(22)$           |
| 74 | 462 | 446 | 452 | 4  | 0  |          | 462.0 vw        | $\delta(\text{CC})$ in phenyl(45)+ $\delta(\text{NNN})(28)+\delta(\text{CO})(25)$ | 449 | 433 | 439 | 3  | 0  |          | 446.6 vw  | $\delta(\text{CCL})(32)+\delta(\text{CC})(25)+\delta(\text{NNN})(22)+\delta(\text{COO})(20)$ |
| -- | --  | --  | --  | -- | -- |          | --              | --                                                                                | --  | --  | --  | -- | -- |          | --        | --                                                                                           |
| 75 | 421 | 405 | 411 | 0  | 0  |          | 404.1 w         | 16a, $\gamma(\text{CC})$ in phenyl (100)                                          | 426 | 410 | 416 | 0  | 0  |          | 412.8 vw  | 10a, $\gamma(\text{CC})$ in phenyl (100)                                                     |
| 76 | 390 | 374 | 381 | 0  | 0  |          | 369.4 vw        |                                                                                   | 387 | 371 | 378 | 1  | 0  |          | 387.7 vw  |                                                                                              |
| 77 | 349 | 333 | 340 | 0  | 0  |          | 352.1 vw        |                                                                                   | 335 | 319 | 327 | 0  | 0  |          | 345.3 vw  |                                                                                              |
| 78 | 345 | 329 | 337 | 0  | 0  |          | 330.8 vw        |                                                                                   | 330 | 314 | 322 | 0  | 0  |          | 325.1 vw  |                                                                                              |
| -- | --  | --  | --  | -- | -- |          | --              |                                                                                   | --  | --  | --  | -- | -- |          | --        |                                                                                              |
| 79 | 313 | 297 | 305 |    |    |          | 311.6 vw        |                                                                                   | 302 | 286 | 294 | 0  | 0  |          | 298.1 vvw |                                                                                              |
| 80 | 285 | 269 | 277 |    |    |          | 278.8 w         |                                                                                   | 286 | 270 | 278 | 0  | 0  |          | 277.8 vw  |                                                                                              |
| 81 | 257 | 241 | 250 |    |    |          | 265.3 vw        |                                                                                   | 268 | 252 | 261 | 1  | 0  |          | 247.9 vw  |                                                                                              |
| 82 | 237 | 221 | 230 |    |    |          | 230.6 w         |                                                                                   | 235 | 219 | 228 | 1  | 1  |          | 220.0 vw  |                                                                                              |
| 83 | 203 | 187 | 197 |    |    |          | 219.0 w         |                                                                                   | 193 | 177 | 187 | 1  | 0  |          | 185.2 vvw |                                                                                              |
| 84 | 191 | 175 | 185 |    |    |          | 192.0 vw        |                                                                                   | 180 | 164 | 174 | 0  | 0  |          | 178.5 vvw |                                                                                              |
| 85 | 168 | 152 | 162 |    |    |          | 161.1 vw        |                                                                                   | 168 | 152 | 162 | 1  | 0  |          | 157.3 vw  |                                                                                              |
| 86 | 154 | 138 | 148 |    |    |          | 145.7 vw        |                                                                                   | 137 | 121 | 131 | 0  | 0  |          | 129.3 vw  |                                                                                              |
| 87 | 130 | 114 | 124 |    |    |          | 132.2 vw        |                                                                                   | 119 | 103 | 114 | 1  | 0  |          | 118.7 vw  |                                                                                              |
| 88 | 73  | 57  | 68  |    |    |          |                 |                                                                                   | 75  | 59  | 70  | 0  | 0  |          |           |                                                                                              |
| 89 | 66  | 50  | 61  |    |    |          |                 |                                                                                   | 65  | 49  | 60  | 0  | 0  |          |           |                                                                                              |
| 90 | 46  | 30  | 41  |    |    |          |                 |                                                                                   | 62  | 46  | 57  | 0  | 0  |          |           |                                                                                              |
| 91 | 43  | 27  | 38  |    |    |          |                 |                                                                                   | 46  | 30  | 41  | 0  | 0  |          |           |                                                                                              |
| 92 | 37  | 21  | 32  |    |    |          |                 |                                                                                   | 39  | 23  | 34  | 0  | 0  |          |           |                                                                                              |
| 93 | 30  | 14  | 26  |    |    |          |                 |                                                                                   | 30  | 14  | 26  | 0  | 0  |          |           |                                                                                              |

\*Assigned to the dimer form. †Observed frequencies characterized by notation: vs= very strong, s= strong, m= medium, ms= medium strong, w=weak band, vw= very weak, vvw= very very weak, sl= shoulder.  $\nu_{as}$ : anti-symmetric stretching,  $\nu_s$ : symmetric stretching,  $\delta$ : in-plane bending,  $\gamma$ : out-of-plane bending,  $\beta$ : scissoring,  $\rho$ : rocking,  $\omega$ : wagging,  $\tau$ : torsion



**Table S2.** Scaled  $^1\text{H}$  NMR Chemical Shifts in **1b** with different solvents.

| solvent     | CH <sub>2</sub><br>H16' | CH <sub>2</sub><br>H16 | CH <sub>2</sub><br>H17' | CH <sub>2</sub><br>H17 | CH <sub>2</sub><br>H15' | CH <sub>2</sub><br>H15 | CH <sub>Ar</sub><br>H6 | CH <sub>Ar</sub><br>H2 | CH <sub>Ar</sub><br>H3 | CH <sub>Ar</sub><br>H5 |
|-------------|-------------------------|------------------------|-------------------------|------------------------|-------------------------|------------------------|------------------------|------------------------|------------------------|------------------------|
| Methanol    | 2.16                    | 2.08                   | 2.08                    | 2.08                   | 3.39                    | 3.66                   | 7.39                   | 7.39                   | 7.95                   | 8.04                   |
| DMSO        | 2.10                    | 2.02                   | 2.02                    | 2.02                   | 3.35                    | 3.62                   | 7.40                   | 7.40                   | 7.97                   | 8.06                   |
| 1,4-dioxane | 2.13                    | 2.02                   | 2.18                    | 2.06                   | 3.42                    | 3.70                   | 7.36                   | 7.36                   | 7.98                   | 8.11                   |
